# Supplementary material for: Highly responsive hydrazine sensors based on donor–acceptor perylene diimides: impact of electron-donating groups
Source: Royal Society of Chemistry journal article supplement (doi:10.1039/c8cp03400a), 2018-01-01
Supplement: c8cp03400a1.pdf [file c8cp03400a1.pdf]

## Electronic Supplementary Information for

### Highly responsive hydrazine sensors based on donor-acceptor perylene diimides: impact of electron-donating groups

Yongwei Huang,<sup>a</sup> Shasha Zhang,<sup>a</sup> Guangcai Zhong,<sup>a</sup> Chunli Li,<sup>b\*</sup>  
Zhonghua Liu<sup>a\*</sup> and Dongzhu Jin<sup>a,c</sup>

<sup>a</sup>Laboratory for Nanomedicine, School of Basic Medical Science, Henan University, Kaifeng 475004, China. E-mail: lzh2001hawk@163.com (Z. Liu)

<sup>b</sup>Engineering Research Center for Nanomaterials, Henan University, Kaifeng 475004, China. E-mail: chunli79@126.com (C. Li)

<sup>c</sup>Joint National Laboratory for Antibody Drug Engineering, Henan University, Kaifeng 475004, China.

#### 1. Synthesis of PDI-PY, PDI-PI and PDI-HE

##### *N,N'*-(*n*-hexadecyl)-1,7-dipyrrolidinylperylene-3,4:9,10-tetracarboxydiimide (PDI-PY).<sup>1</sup>

*N,N'*-(*n*-hexadecyl)-1,7-dibromoperylene-3,4:9,10-tetracarboxylic diimide (0.066 g, 0.066 mmol), pyrrolidine (2.23 g, 31.4 mmol) and dry K<sub>2</sub>CO<sub>3</sub> (0.50 g, 3.60 mmol) was stirred under Ar for 24 h at 55 °C. Subsequently, the reaction mixture was poured into 15 mL of 10% HCl under stirring and extracted with methylene chloride (3×30 mL), dried over MgSO<sub>4</sub>, and concentrated by rotary evaporation. The resulting precipitate was purified by column chromatography on silica gel (eluent: CH<sub>2</sub>Cl<sub>2</sub>) to yield green solid PDI-PY (34.4 mg, 53%). <sup>1</sup>H NMR (400 MHz, CDCl<sub>3</sub>), δ (ppm): 7.42-8.70 (m, 6 H), 4.21 (m, 4 H), 3.72 (m, 4 H), 2.79 (m, 8 H), 1.75(m, 4 H), 1.30 (m, 56 H), 0.87(m, 6 H). <sup>13</sup>C NMR(100 MHz,CDCl<sub>3</sub>): δ (ppm) 167.7, 163.9, 146.3, 130.8, 129.8, 128.8, 126.5,123.6, 122.0, 121.6, 120.6, 119.0, 118.0,

77.3, 77.0, 76.7, 68.1, 65.5, 52.1, 40.5, 38.7, 29.7, 29.6, 29.3, 28.2, 25.7, 23.7, 22.6, 19.1, 14.1, 13.7, 10.9. MS (MALDI-TOF): calcd for C<sub>64</sub>H<sub>88</sub>N<sub>2</sub>O<sub>4</sub>, 976.68 m/z, found 976.9.

***N,N'*-(*n*-hexadecyl)-1,7-dipiperidinylperylene-3,4:9,10-tetracarboxyldiimide (PDI-PI).<sup>2</sup>**

N, N'-(*n*-hexadecyl)-1,7-dibromoperylene-3,4:9,10-tetracarboxylic diimide (0.066 g, 0.066 mmol), piperidine (2.67 g, 31.4 mmol) and dry K<sub>2</sub>CO<sub>3</sub> (0.50 g, 3.60mmol) was stirred under Ar for 24 h at 55 °C. Subsequently, the reaction mixture was poured into 15 mL of 10% HCl under stirring and extracted with methylene chloride (3×30 mL), dried over MgSO<sub>4</sub>, and concentrated by rotary evaporation. The resulting precipitate was purified by column chromatography on silica gel (eluent: CH<sub>2</sub>Cl<sub>2</sub>) to yield green solid **PDI-PI** (23.8 mg, 35%). <sup>1</sup>H NMR (400 MHz, CDCl<sub>3</sub>), δ (ppm): 7.50-9.66 (m, 6 H), 4.21 (m, 4 H), 3.33(m, 4 H), 2.76(m, 4 H), 1.73(m, 12 H), 1.30(m, 56 H), 0.86(m, 6 H). <sup>13</sup>C NMR(100 MHz,CDCl<sub>3</sub>): δ (ppm) 162.6, 162.4, 161.5, 149.6, 134.1, 126.7, 122.4, 122.0, 121.5, 121.2, 119.7, 76.3, 76.2, 76.0, 75.6, 52.1, 51.6, 28.6, 28.5, 28.3, 26.2, 24.7, 21.6, 13.0. MS (MALDI-TOF): calcd for C<sub>64</sub>H<sub>92</sub>N<sub>4</sub>O<sub>4</sub>, 1004.71 m/z, found 1005.1.

***N,N'*-(*n*-hexadecyl)-1,7-di(*n*-hexylamineperylene)-3,4:9,10-tetracarboxyldiimide (PDI-HE).<sup>3</sup>**

N, N'-(*n*-hexadecyl)-1,7-dibromoperylene-3,4:9,10-tetracarboxylic diimide (0.066 g, 0.066 mmol), *n*-hexylamine (3.17 g, 31.4 mmol) and dry K<sub>2</sub>CO<sub>3</sub> (0.50 g, 3.60vmmol) was stirred under Ar for 24 h at 55 °C. Subsequently, the reaction mixture was poured into 15 mL of 10% HCl under stirring and extracted with chloroform (3×30 mL), dried over MgSO<sub>4</sub>, and concentrated by rotary evaporation. The resulting precipitate was purified by column chromatography on silica gel (eluent: petroleum ether/CH<sub>2</sub>Cl<sub>2</sub>, 1:9) to yield blue PDI-HE (24.6 mg, 36%). <sup>1</sup>H NMR (400 MHz, CDCl<sub>3</sub>), δ(ppm): 8.81(d, 2 H), 7.50-9.66(m, 6 H), 4.20 (m, 4 H), 3.48(m, 4 H), 1.67-1.87 (m, 4 H), 1.67-1.87 (m, 4 H), 1.34-1.20 (m, 64 H), 0.95(m, 6 H), 0.87(m, 6 H). <sup>13</sup>C NMR(100 MHz,CDCl<sub>3</sub>): δ (ppm) 162.5, 162.0, 144.6, 132.6, 128.5, 125.5, 121.2, 120.9, 120.1, 118.8, 116.5, 115.4, 76.3, 76.2, 76.0, 75.6, 43.5, 39.5, 28.6, 27.0, 21.5, 13.1, 13.0. MS (MALDI-TOF): calcd for C<sub>68</sub>H<sub>100</sub>N<sub>4</sub>O<sub>4</sub>, 1036.77 m/z, found 1036.89.

## 2. Supporting Figures

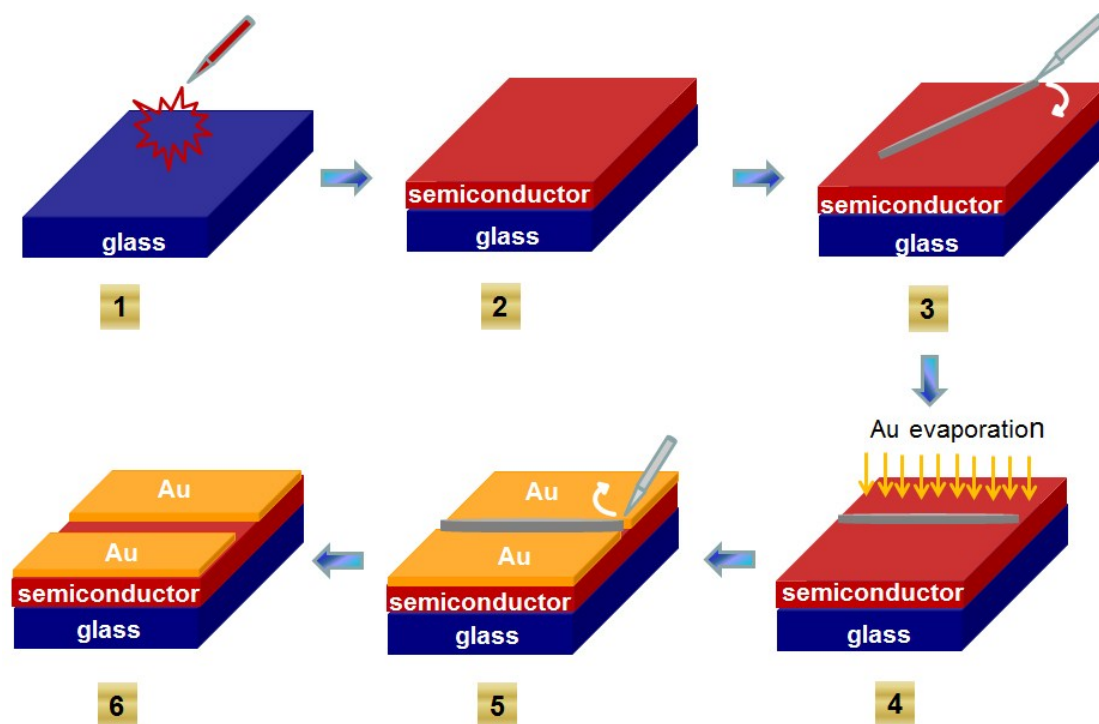

Fig. S1 Schematic diagram of device fabrication by using “organic ribbon mask” technique.

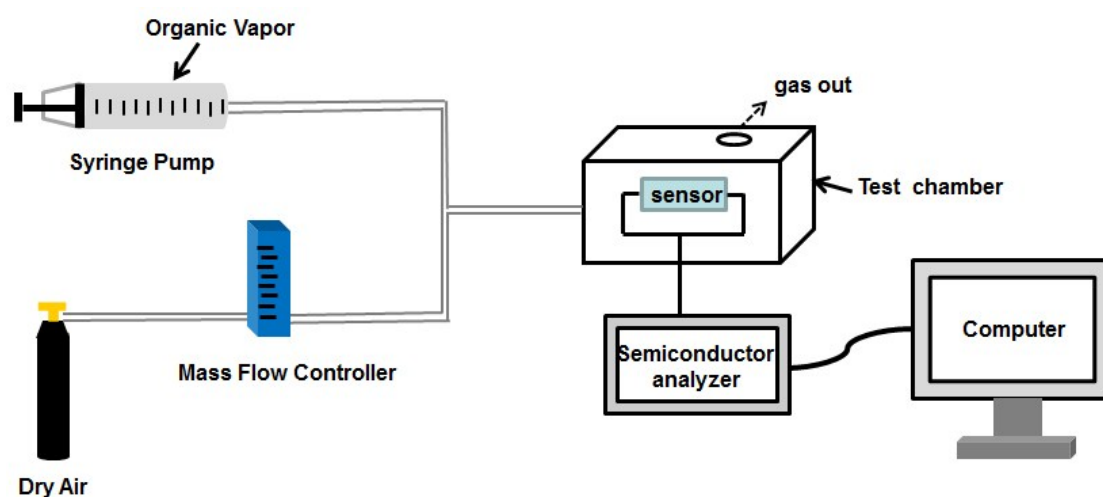

Fig. S2 Schematic diagram for the vapor sensing measurement system.

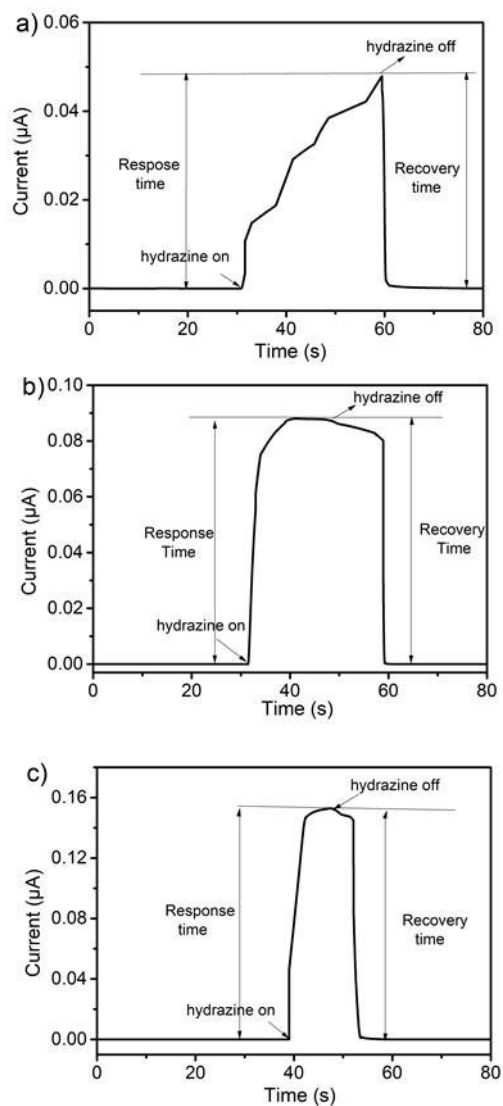

**Fig. S3** Response and recovery time of the (a) PDI-PY, (b) PDI-PI and (c) PDI-HE devices.

## References

- 1 A. Lukas, Y. Zhao, S. Miller and M. Wasielewski, *J. Phys. Chem. B*, 2002, **106**, 1299.
- 2 M. Planells, F. Céspedes-Guirao, L. Gonçalves, A. Sastre-Santos, F. Fernández-Lázaro, *J. Mater. Chem.*, 2009, **19**, 5818.
- 3 M. Ahrens, M. Tauber, M. Wasielewski, *J. Org. Chem.*, 2006, **71**, 2107.
